# Supplementary material for: Seips and Institutional Theory: A Study of Work Systems and Isomorphic Pressures in Icu Triage Decision-Making Within Adult Surgical Patients
Source: Research Square preprint supplement (doi:10.21203/rs.3.rs-8604476/v1), 2026-02-04
Supplement: Supplementary file 1 [file e70fb6036eb7779b61fd490e.docx]

**Additional File 1.** Surgical ICU Triage and Admission Interview Guide (consent script not included)

**ID #:** First Initial.Last Initital.Role.Clinical Service.Interview Number

**Interview Date:** DD/MM/YYYY

**Tenure at present hospital:** Months, Years

**Role:** Attending Surgeon, ICU Intensivist, Surgical Nurse, Resident, Surgical Scheduler, Program Director

**Clinical Service:** SICU, WICU, Orthopedics, HPB, HIPEC, Thoracic.

**Opening**

- The purpose of this study is to explore factors related to Surgical intensive care triage and admission decisions. We are asking you to participate in our study because your service conducts many surgical cases at the hospital, with patients requiring post-operative care in the ICU.
- You may also be a clinician who cares for ICU patients or a staff member who schedules elective surgeries, and have insight into triage and admission processes, unit structures, and other factors. Your insights should enhance the understanding of barriers and facilitators in the surgical ICU environment.
- We plan to conduct interviews with 30 to 40 ne employees, including surgeons, ICU intensivists, surgical nurses, residents, and surgical schedulers. Ultimately, the research should lead to interventions that make level of care decisions easier and facilitate improved health outcomes for patients.
- This interview will ask you to provide details regarding level of care decisions for surgical patients who require post-operative admission to the ICU. The focus is exclusively on elective surgery patients.
- I will give you a minute to think about your day-to-day experience. Try to remember as many details as you can. After you have thought about how level of care decisions are made, I will ask you to describe this in as much detail as possible.

**Overview Question:** How is the level of post-operative care determined for elective surgery patients? Please provide as much detail as possible.

Now I am going to ask a series of questions about the information you just provided. There are no correct answers. These questions are just to better understand your own experiences and perceptions. Some of the questions will refer to information that you have just provided; other questions will ask about information that you did not mention. Answer each question to the best of your ability, giving as much detail as possible. If you cannot answer the question because you don’t know, please say so. If you do not want to answer a question for personal or professional reasons, please let me know and we will skip that question.

I’d like to start by asking a few questions related to the workplace experience. I’m specifically interested in learning how things like organizational culture, organization structure, tools and technology, and process may affect level of care decisions.

**Follow-Up Questions/Probes**

- Would you please describe, in as much detail as possible, your role in post-operative level of care decision-making?
- How do others assist you in making level of care decisions for patients?
- In what ways is level of care appropriateness important for surgical patients?
- What adjectives would you use to describe the culture here?
- How are process and business performance problems solved?
- When you think of your experience working at the hospital, what things make level of care decisions easier for you?
- What things make this process challenging for you? *May have to use the following probes:*
  - *Can you describe anything about the intermediate care unit that may influence your decision to admit a patient to the ICU?*
  - *Can you describe anything about general floors that may influence your decision to admit a patient to a higher level of care?*
  - *How often does bed availability affect level of care decisions?*
- How are level of care decisions impacted by the day of the week or time of day the patient is in surgery?
- How important is level of care appropriateness for surgical patients to hospital leadership?
- What has hospital leadership done to demonstrate its importance?

Now I’d like to shift our focus to the patient. The patient population at this hospital is quite diverse. I bet you take care of patients with a wide range of social, economic, behavioral, and physical needs. I’d like to understand how differences in the way patients present influence how level of care decisions are made. I will ask you to describe this in as much detail as possible. First, I’ll give you a minute to reflect on the types of patients you provide care for.

**Follow-Up Questions/Probes**

- Which characteristics will lead you to definitely admit a patient to the ICU, if any?
- How do you make post-operative care decisions when patients fall somewhere between high and low levels of acuity?
- Which characteristics will lead you to downgrade a patient from ICU to IMC or floor, if any?
- How do patients communicate their post-operative care preferences and needs?
- How are advanced directives used when making level of care decisions?

The last set of questions will help me understand the tools and resources available to make level of care decisions easier and more effective for you. Please let me know if you’d like a moment to pause and think about this. *If requested, give the interview participant a few minutes to think. He or she may jot down notes to help with recall.*

**Follow-Up Questions/Probes**

- What is currently in place to help you make level of care decisions?
- How broadly are tools like NSQIP (American College of Surgeons National Surgical Quality Improvement Program) and SURPAS (Surgical Risk Preoperative Assessment System) used in making decisions for elective surgery patients?
- How familiar are you with the Surgical Nursing Scope of Care guidelines?
- Can you please describe how these guidelines are used in daily practice?
- To what extent have you been provided training or mentoring to make level of care decisions?
- What could be done to make level of care decisions easier?
- What best practices could the hospital adopt to improve how these decisions are made for elective surgery patients?

**Closing**

- Is there anything else you would like to share regarding level of care decision-making for elective surgical patients?
- Are there any questions I can answer for you today?

Thank you so much for your time and for sharing your expertise. Your insights are incredibly valuable to this study. Would you like to see the audio transcript of your interview when it’s available? There may be content you’d like to clarify or expand on, and I want to give you every opportunity to do so. After we finish our interviews, are you interested in receiving a summary of what we’ve learned? If so, what kind of format would you prefer? (e.g. A group meeting? An electronic summary like PowerPoint? A video recording?). There may also be an opportunity to collaborate on the development of new tools and interventions. Is this something you’d be interested in helping with?
