# Supplementary material for: Seips and Institutional Theory: A Study of Work Systems and Isomorphic Pressures in Icu Triage Decision-Making Within Adult Surgical Patients
Source: Research Square preprint supplement (doi:10.21203/rs.3.rs-8604476/v1), 2026-02-04
Supplement: Supplementary file 2 [file fe7d0d68ea69de015d0f7613.docx]

**Additional File 2.**Participant Quotations Aligned with Framework Domains and Qualitative Data Themes

| **Framework Domain** | **Quote** | **Theme** |
| --- | --- | --- |
| SEIPS – Organization, 06CS | “They aren’t going to do vital signs more than every Q4.” | Limits of floor monitoring |
| SEIPS – Organization, 06CS | “It’s either that (patients go to the ICU) or they go to our unmonitored floor unit, which is not...yeah, which is not ideal.” | Lack of safe ICU alternatives |
| SEIPS – Organization (Culture), 01AA | “We have systems that are designed for failure.” | Institutional resistance to change |
| SEIPS – Organization (Culture), 18AL | “All you could do is write about it, and 10 years later someone will be like, oh, what a good idea!” | Institutional resistance to change |
| SEIPS – Organization (Medical Management), 07EM | “90% of the people that I send to the ICU after surgery probably would be fine in an IMC-type situation where you’ve got nurses and PAs who really know what they’re doing... and they’re better than my interns.” | Perception of weak medical co-management on floor |
| SEIPS – Organization (Quality & Safety), 09JJ | “We are patient focused. There’s an attending in the ICU, so the surgeon knows their patient is covered or watched by an attending…so they can rest easy that if something comes up it’s going to be caught or addressed.” | ICU as reassurance for safety |
| SEIPS – Organization (Quality & Safety), 07EM | “The families feel better, and I feel better, if they’re closely monitored for the first 24 hours.” | ICU as reassurance for safety |
| Institutional Theory – (Quality & Safety), 20TD | “Whatever bad thing happened in any of the last three to five cases now becomes a priority item, and it may have minimal impact on the individual in front of you, but you don’t care because of the bad event that occurred three patients ago.” | Risk aversion from prior adverse events |
| SEIPS – Tasks/Processes, 06CS | “You’d rather bring the patient into the ICU, do an assessment and then downgrade them, if need be, rather than they come to the floor, and then you’re doing a Rapid Response Team call to get them to the ICU.” | Preference for anticipatory escalation |
| Institutional Theory – Normative pressures, 18AL | “The ghosts of Blalock still walk these hallways and tell everyone how the OR is supposed to run.” | Historical professional norms |
| Institutional Theory – Coercive pressures, 04MO | “When something goes wrong, people always ask why the patient wasn’t in the ICU.” | Defensive, safety-first mindset |
| SEIPS – Tasks & Institutional Theory (Coercive), 03LH | “This is a hard rule. Post a case without a posting sheet, and the liability is on the person who put it in…what’s on that posting sheet is what we’re going to do.” | Posting process and liability |
| Institutional Theory – Coercive pressures and SEIPS – Organization (Medical Management), 18AL | “Some surgeons are very risk averse…very nervous about medical legal concerns, and very uncomfortable with post operative patient care management…and being responsible for a patient that is deemed sick.” | Legal risk and discomfort with medical management |
| Institutional Theory – Coercive pressures, 01AA | “To me, it’s not a matter of safe. It’s a matter of what’s the most safe…if X happens because we didn’t do Y, then we are screwed and the patient is dead.” | Defensive, safety-first mindset, liability |
| Institutional Theory – Normative pressures, 21DS_MM_KB | “There’s a pathway. They all go to the ICU. Even if you are fairly confident that they wouldn’t need to go, they still go.” | Institutional triage norms |
| Institutional Theory – Mimetic (absence), 14PMT | “JHU is decades behind other systems in technology integration.” | Reluctance to adopt external innovations |
| Institutional Theory – Mimetic (absence), 06CS | “There could be 15 different papers, and they all say the same thing. But Hopkins will say we should do our own study. And then, if our study shows what others do then we’ll believe it.” | Reluctance to adopt external innovations |
| SEIPS – Environment, 21DS_MM_KB | “…they could probably go to IMC. And I thought to myself…it’s gonna be such a long walk in the morning!” | Geographic inconvenience of IMC |
| SEIPS – Environment, 02NN | “The ICU is in the same building as cancer care. So logistically, it’s like, that’s where cancer care mostly happens. To put a patient in IMC because they’re kind of on the bubble…just doesn’t feel that helpful, really.” | Geographic inconvenience of IMC |  |
| SEIPS – People, 13VE | “And then it’s comorbidities…cardiac and pulmonary function—those are the big ones.” | Patient-level comorbidities |
| SEIPS – Tools & Technology, 02NN | “There are scores and tools that exist, but I can’t say I’ve ever really used them, and I don’t think I’ve ever really seen my faculty mentors use them.” | Poor perceived reliability of predictive tools |
| SEIPS – Tools & Technology, 05JH | “There is a similar analogous risk calculator, but none of us really use it…probably because we don’t think it’s really reliable.” | Poor perceived reliability of predictive tools |
| SEIPS – Tools & Technology, 05JH | “I don’t know them. I’m sure they exist. I’ve never read them.” | Lack of awareness of guidelines |
| SEIPS – Tasks, 03LH | “I’m going to be brutally honest…I hate electronic posting sheets.” | Fragmented scheduling workflow |
| SEIPS – Tasks, 03LH | “…there is missing information, and then you have to track it down.” | Fragmented scheduling workflow |
| SEIPS – Tasks, 19AJ | “If you’re on the fence… it’s easier to downgrade.” | Over-posting then downgrading as a strategy |
| SEIPS – Tasks, 23NW | “There’s a difference between critical care billing by provider and critical care billing by the institution…” | Awareness of billing incentives |
| SEIPS – Tasks, 07EM | “Sometimes attendings (evaluate the patients). I don’t know what they do or how they do it…” | Inconsistency in preoperative assessments |
| SEIPS – Processes, 22CB_SM | “I feel like, maybe the nurses on the units [the floors] don’t get high enough acuity, so they don’t know how to respond.” | Perceived lack of escalation readiness |
